# Supplementary material for: Advising vaccinations for the elderly: a cross-sectional survey on differences between general practitioners and physician assistants in Germany
Source: PubMed Central journal article supplement (PMC4966563; doi:10.1186/s12875-016-0502-3), 2016-07-29
Supplement: 12875_2016_502_MOESM1_ESM.pdf [file 12875_2016_502_MOESM1_ESM.pdf]

Additional File 1: Variables: definitions and origins

| Variable                                                      | Scale/Categories                                                                                                                        | Comment/Explanation                                                                                                     |
|---------------------------------------------------------------|-----------------------------------------------------------------------------------------------------------------------------------------|-------------------------------------------------------------------------------------------------------------------------|
| <b>Socio-demographic and surgery-characteristics</b>          |                                                                                                                                         |                                                                                                                         |
| ID                                                            | -                                                                                                                                       | Practice ID                                                                                                             |
| Profession                                                    | <ul style="list-style-type: none"> <li>• General Practitioner</li> <li>• Physician Assistant</li> </ul>                                 | -                                                                                                                       |
| Counseling is done by                                         | <ul style="list-style-type: none"> <li>• Physician</li> <li>• Physician Assistant</li> <li>• Both</li> <li>• Other Person</li> </ul>    | -                                                                                                                       |
| Percentage of patients of at least 60 years                   | metric                                                                                                                                  | Estimate of participant                                                                                                 |
| Amount of patients of at least 60 years                       | <ul style="list-style-type: none"> <li>• &lt; 50%</li> <li>• ≥50%</li> </ul>                                                            | dichotomized; derived from variable "Percentage of patients of at least 60 years"                                       |
| Years working in outpatient care                              | metric                                                                                                                                  | derived from year in which participant started working in outpatient care                                               |
| Age                                                           | metric                                                                                                                                  | -                                                                                                                       |
| Derived variable: Age                                         | <ul style="list-style-type: none"> <li>• &lt; median of profession</li> <li>• ≥median of profession</li> </ul>                          | dichotomization in each profession by rounded median<br>General Practitioner: 50 years<br>Physician Assistant: 40 years |
| Specialty                                                     | <ul style="list-style-type: none"> <li>• General Medicine</li> <li>• Internist</li> <li>• No specialization</li> <li>• Other</li> </ul> | In questionnaire for Physician Assistants we asked for the specialty of the respective Physician                        |
| Location of Practice                                          | <ul style="list-style-type: none"> <li>• Eastern part of Germany (including Berlin)</li> <li>• Western part of Germany</li> </ul>       | Derived from reported federal state                                                                                     |
| <b>Subjective Knowledge</b>                                   |                                                                                                                                         |                                                                                                                         |
| Knows official STIKO-recommendations                          | <ul style="list-style-type: none"> <li>• Yes</li> <li>• Neutral</li> <li>• No</li> </ul>                                                | Aggregated Likert-Scale:<br>Yes: Applies<br>Rather applies<br>Neutral<br>No: Does rather not apply<br>Does Not apply    |
| Feels sufficiently informed regarding vaccinations for adults | <ul style="list-style-type: none"> <li>• Yes</li> <li>• Neutral</li> <li>• No</li> </ul>                                                | Aggregated Likert-Scale:<br>Yes: Applies<br>Rather applies<br>Neutral<br>No: Does rather not apply<br>Does Not apply    |
| <b>Attitudes</b>                                              |                                                                                                                                         |                                                                                                                         |
| Patients should be informed by                                | <ul style="list-style-type: none"> <li>• General Practitioner</li> <li>• Other medical specialist</li> </ul>                            | Multiple answers possible<br>Public Authorities: examples in                                                            |

|                                                                                                                |                                                                                                                                                                                                                                                    |                                                                                                                      |
|----------------------------------------------------------------------------------------------------------------|----------------------------------------------------------------------------------------------------------------------------------------------------------------------------------------------------------------------------------------------------|----------------------------------------------------------------------------------------------------------------------|
|                                                                                                                | <ul style="list-style-type: none"> <li>• Public Authorities</li> <li>• Physician Assistant</li> <li>• Self-help/support groups for vaccine-preventable diseases</li> <li>• Media</li> <li>• Health insurance companies</li> <li>• Other</li> </ul> | questionnaire: Robert-Koch institute and Federal Centre for Health Education                                         |
| Appreciates it if patients start the conversation about vaccinations                                           | <ul style="list-style-type: none"> <li>• Yes</li> <li>• Neutral</li> <li>• No</li> </ul>                                                                                                                                                           | Aggregated Likert-Scale:<br>Yes: Applies<br>Rather applies<br>Neutral<br>No: Does rather not apply<br>Does Not apply |
| Trusts official STIKO-recommendations                                                                          | <ul style="list-style-type: none"> <li>• Yes</li> <li>• Neutral</li> <li>• No</li> </ul>                                                                                                                                                           | Aggregated Likert-Scale:<br>Yes: Applies<br>Rather applies<br>Neutral<br>No: Does rather not apply<br>Does Not apply |
| Wants more patient information by public authorities                                                           | <ul style="list-style-type: none"> <li>• Yes</li> <li>• Neutral</li> <li>• No</li> </ul>                                                                                                                                                           | Aggregated Likert-Scale:<br>Yes: Applies<br>Rather applies<br>Neutral<br>No: Does rather not apply<br>Does Not apply |
| Finds financial compensation for advising and vaccinating sufficient                                           | <ul style="list-style-type: none"> <li>• Yes</li> <li>• Neutral</li> <li>• No</li> </ul>                                                                                                                                                           | Aggregated Likert-Scale:<br>Yes: Applies<br>Rather applies<br>Neutral<br>No: Does rather not apply<br>Does Not apply |
| Likes to counsel on vaccinations                                                                               | <ul style="list-style-type: none"> <li>• Yes</li> <li>• Neutral</li> <li>• No</li> </ul>                                                                                                                                                           | Aggregated Likert-Scale:<br>Yes: Applies<br>Rather applies<br>Neutral<br>No: Does rather not apply<br>Does Not apply |
| Thinks that the additional training for Physician assistants to become an assistant for vaccinations is useful | <ul style="list-style-type: none"> <li>• Yes</li> <li>• Neutral</li> <li>• No</li> </ul>                                                                                                                                                           | Aggregated Likert-Scale:<br>Yes: Applies<br>Rather applies<br>Neutral<br>No: Does rather not apply<br>Does Not apply |
| Wants better information on changes of official vaccination recommendations                                    | <ul style="list-style-type: none"> <li>• Yes</li> <li>• Neutral</li> <li>• No</li> </ul>                                                                                                                                                           | Aggregated Likert-Scale:<br>Yes: Applies<br>Rather applies                                                           |

|                                                                                                                                         |                                                                                                                                                                                                  |                                                                                                                           |
|-----------------------------------------------------------------------------------------------------------------------------------------|--------------------------------------------------------------------------------------------------------------------------------------------------------------------------------------------------|---------------------------------------------------------------------------------------------------------------------------|
|                                                                                                                                         |                                                                                                                                                                                                  | Neutral<br>No: Does rather not apply<br>Does Not apply                                                                    |
| There is often lack of time for vaccinations and advising about them                                                                    | <ul style="list-style-type: none"> <li>• Yes</li> <li>• Neutral</li> <li>• No</li> </ul>                                                                                                         | Aggregated Likert-Scale:<br>Yes: Applies<br>Rather applies<br>Neutral<br>No: Does rather not apply<br>Does Not apply      |
| Generally objects vaccinations                                                                                                          | <ul style="list-style-type: none"> <li>• Yes</li> <li>• Neutral</li> <li>• No</li> </ul>                                                                                                         | Aggregated Likert-Scale:<br>Yes: Applies<br>Rather applies<br>Neutral<br>No: Does rather not apply<br>Does Not apply      |
| The perceived benefit of officially recommended vaccines exceeds its potential harms                                                    | <ul style="list-style-type: none"> <li>• Yes</li> <li>• Neutral</li> <li>• No</li> </ul>                                                                                                         | Aggregated Likert-Scale:<br>Yes: Applies<br>Rather applies<br>Neutral<br>No: Does rather not apply<br>Does Not apply      |
| The perceived benefit of officially recommended tetanus vaccine for at least 60-years old individuals exceeds its potential harms       | <ul style="list-style-type: none"> <li>• Yes</li> <li>• Neutral</li> <li>• No</li> </ul>                                                                                                         | Aggregated Likert-Scale:<br>Yes: Applies<br>Rather applies<br>Neutral<br>No: Does rather not apply<br>Does Not apply      |
| The perceived benefit of officially recommended influenza vaccines for at least 60-years old individuals exceeds its potential harms    | <ul style="list-style-type: none"> <li>• Yes</li> <li>• Neutral</li> <li>• No</li> </ul>                                                                                                         | Aggregated Likert-Scale:<br>Yes: Applies<br>Rather applies<br>Neutral<br>No: Does rather not apply<br>Does Not apply      |
| The perceived benefit of officially recommended pneumococcal vaccines for at least 60-years old individuals exceeds its potential harms | <ul style="list-style-type: none"> <li>• Yes</li> <li>• Neutral</li> <li>• No</li> </ul>                                                                                                         | Aggregated Likert-Scale:<br>Yes: Applies<br>Rather applies<br>Neutral<br>No: Does rather not apply<br>Does Not apply      |
| Cause that vaccination recommendations are not well implemented                                                                         | <ul style="list-style-type: none"> <li>• Physicians</li> <li>• Patients</li> <li>• Both</li> <li>• None of them</li> </ul>                                                                       |                                                                                                                           |
| Did ever not advise tetanus vaccination because                                                                                         | <ul style="list-style-type: none"> <li>• Disease is harmless</li> <li>• Forgot to advise</li> <li>• Vaccine is ineffective</li> <li>• Does not feel responsible for this vaccinations</li> </ul> | Only applied when participant stated to have not advised at least one vaccination (see below). Multiple answers possible. |

|                                                                                 |                                                                                                                                                                                                                                                                                                                                                                                                                               |                                                                                                                                                                                                                               |
|---------------------------------------------------------------------------------|-------------------------------------------------------------------------------------------------------------------------------------------------------------------------------------------------------------------------------------------------------------------------------------------------------------------------------------------------------------------------------------------------------------------------------|-------------------------------------------------------------------------------------------------------------------------------------------------------------------------------------------------------------------------------|
|                                                                                 | <ul style="list-style-type: none"> <li>• Vaccine is not safe</li> <li>• Was not aware of recommendation</li> <li>• Risk of the patient to catch disease is low</li> <li>• Accounting is too complicated</li> <li>• Reimbursement does not compensate the effort</li> </ul>                                                                                                                                                    |                                                                                                                                                                                                                               |
| Did ever not advise influenza vaccination because                               | <ul style="list-style-type: none"> <li>• Disease is harmless</li> <li>• Forgot to advise</li> <li>• Vaccine is ineffective</li> <li>• Does not feel responsible for vaccinations</li> <li>• Vaccine is not safe</li> <li>• Was not aware of recommendation</li> <li>• Risk of the patient to catch disease is low</li> <li>• Accounting is too complicated</li> <li>• Reimbursement does not compensate the effort</li> </ul> | Only when participant stated to have not advised at least one vaccination. Multiple answers possible, ticked when agreed, every reason coded as one variable                                                                  |
| Did ever not advise Pneumococcal vaccination because                            | <ul style="list-style-type: none"> <li>• Disease is harmless</li> <li>• Forgot to advise</li> <li>• Vaccine is ineffective</li> <li>• Does not feel responsible for vaccinations</li> <li>• Vaccine is not safe</li> <li>• Was not aware of recommendation</li> <li>• Risk of the patient to catch disease is low</li> <li>• Accounting is too complicated</li> <li>• Reimbursement does not compensate the effort</li> </ul> | Only when participant stated to have not advised at least one vaccination. Multiple answers possible, ticked when agreed, every reason coded as one variable                                                                  |
| <b>Practices</b>                                                                |                                                                                                                                                                                                                                                                                                                                                                                                                               |                                                                                                                                                                                                                               |
| Did not advise at least one vaccination in the absence of any contraindication. | <ul style="list-style-type: none"> <li>• Yes</li> <li>• No</li> </ul>                                                                                                                                                                                                                                                                                                                                                         | Did not advise "once" and "several times" were aggregated. In the question it was specified, that officially recommended vaccinations for the elderly ( $\geq 60$ years) are of interest, if no contraindication was present. |
| Did not advise Tetanus vaccination in the absence of any contraindication.      | <ul style="list-style-type: none"> <li>• Yes</li> <li>• No</li> </ul>                                                                                                                                                                                                                                                                                                                                                         | Derived from "Did ever not advise Tetanus vaccination because". If a reason was ticked,                                                                                                                                       |

|                                                                                 |                                                                                                                                                                                                                                                                                                                                                                                                                                                       |                                                                                                                               |
|---------------------------------------------------------------------------------|-------------------------------------------------------------------------------------------------------------------------------------------------------------------------------------------------------------------------------------------------------------------------------------------------------------------------------------------------------------------------------------------------------------------------------------------------------|-------------------------------------------------------------------------------------------------------------------------------|
|                                                                                 |                                                                                                                                                                                                                                                                                                                                                                                                                                                       | this variable was coded as “yes”                                                                                              |
| Did not advise Influenza vaccination in the absence of any contraindication.    | <ul style="list-style-type: none"> <li>• Yes</li> <li>• No</li> </ul>                                                                                                                                                                                                                                                                                                                                                                                 | Derived from “Did ever not advise Influenza vaccination because”. If a reason was ticked, this variable was coded as “yes”    |
| Did not advise Pneumococcal vaccination in the absence of any contraindication. | <ul style="list-style-type: none"> <li>• Yes</li> <li>• No</li> </ul>                                                                                                                                                                                                                                                                                                                                                                                 | Derived from “Did ever not advise Pneumococcal vaccination because”. If a reason was ticked, this variable was coded as “yes” |
| Opportunities for vaccination counseling                                        | <ul style="list-style-type: none"> <li>• Preventive Check-up</li> <li>• Patient addresses vaccination</li> <li>• Travel plans of patients</li> <li>• First contact with a patient</li> <li>• Injuries/accidents</li> <li>• Routinely at regular intervals</li> <li>• Indication of a recall-system</li> <li>• Other</li> </ul>                                                                                                                        | Multiple answers possible                                                                                                     |
| Source of information regarding recommended vaccines                            | <ul style="list-style-type: none"> <li>• Continuous (online) training</li> <li>• Professional journals</li> <li>• Association of Statutory Health Insurance Physicians or Medical Association</li> <li>• Conferences</li> <li>• Pharmaceutical /company representatives</li> <li>• Professional association</li> <li>• Permanent vaccination commission/Robert Koch-Institute</li> <li>• Does not seek information at all</li> <li>• Other</li> </ul> | Multiple answers possible                                                                                                     |
