# Supplementary material for: Advising vaccinations for the elderly: a cross-sectional survey on differences between general practitioners and physician assistants in Germany
Source: PubMed Central journal article supplement (PMC4966563; doi:10.1186/s12875-016-0502-3), 2016-07-29
Supplement: 12875_2016_502_MOESM2_ESM.pdf [file 12875_2016_502_MOESM2_ESM.pdf]

Additional File 2: Multivariable analyses of associations with not advising vaccinations despite STIKO-recommendation, n=1230

| Variables                                                                                                                                                                                     | Did not advise any vaccination        |                                  | Did not advise tetanus vaccination    |                       | Did not advise influenza vaccination  |                                  | Did not advise pneumococcal vaccination |                       |
|-----------------------------------------------------------------------------------------------------------------------------------------------------------------------------------------------|---------------------------------------|----------------------------------|---------------------------------------|-----------------------|---------------------------------------|----------------------------------|-----------------------------------------|-----------------------|
|                                                                                                                                                                                               | OR (95%CI)                            | p-value                          | OR (95%CI)                            | p-value               | OR (95%CI)                            | p-value                          | OR (95%CI)                              | p-value               |
| <b>SD</b>                                                                                                                                                                                     |                                       |                                  |                                       |                       |                                       |                                  |                                         |                       |
| Respondent is GP (Reference: PA)                                                                                                                                                              | 1.43 (0.91-2.22)                      | 0.118                            | 2.81 (1.46-5.42)                      | <b>0.002</b>          | 2.63 (1.51-4.58)                      | <b>0.001</b>                     | 1.84 (1.13-3.01)                        | <b>0.015</b>          |
| Practice in Western part of Germany (Reference: East)                                                                                                                                         | 2.91 (1.72-4.92)                      | <b>&lt;0.001</b>                 | 1.77 (0.88-3.57)                      | 0.110                 | 2.36 (1.25-4.45)                      | <b>0.008</b>                     | 2.80 (1.55-5.06)                        | <b>0.001</b>          |
| Amount of patients of ≥60 yrs less than 50% (Reference: ≥50%)                                                                                                                                 | 1.57 (1.10-2.23)                      | <b>0.013</b>                     |                                       |                       |                                       |                                  | 1.61 (1.10-2.37)                        | <b>0.015</b>          |
| Age at least at the median of the respected profession (Reference: In GP: younger than 50 years; in PA: younger than 40 years)                                                                |                                       |                                  | 1.75 (1.00-3.06)                      | <b>0.049</b>          |                                       |                                  |                                         |                       |
| Wants more information for patients by public authorities<br>Reference: Yes<br>Neutral<br>No                                                                                                  | 1.62 (1.08-2.42)<br>1.22 (0.74-1.99)  | <b>0.019</b><br>0.435            |                                       |                       |                                       |                                  | 1.52 (0.98-2.35)<br>1.31 (0.77-2.22)    | 0.064<br>0.321        |
| Wants better information on changes of official recommendations<br>Reference: Yes<br>Neutral<br>No                                                                                            | 0.62 (0.39-1.01)<br>0.77 (0.43-1.36)  | 0.055<br>0.363                   | 0.53 (0.26-1.04)<br>0.70 (0.30-1.61)  | 0.065<br>0.400        |                                       |                                  | 0.58 (0.34-0.98)<br>0.67 (0.34-1.30)    | <b>0.041</b><br>0.234 |
| Trusts in official STIKO-recommendations<br>Reference: Yes<br>Neutral<br>No                                                                                                                   | 3.86 (1.94-7.65)<br>4.43 (1.01-19.42) | <b>&lt;0.001</b><br><b>0.048</b> | 2.00 (0.83-4.85)<br>4.89 (1.45-16.49) | 0.124<br><b>0.010</b> | 2.98 (1.46-6.08)<br>4.45 (1.29-15.39) | <b>0.003</b><br><b>0.018</b>     | 1.55 (0.73-3.27)<br>2.86 (0.78-10.49)   | 0.251<br>0.113        |
| Likes to counsel about vaccinations<br>Reference: Yes<br>Neutral<br>No                                                                                                                        | 2.56 (1.44-4.54)<br>0.77 (0.20-2.97)  | <b>0.001</b><br>0.699            | 2.09 (1.01-4.34)<br>2.20 (0.62-7.81)  | <b>0.047</b><br>0.223 | 1.98 (1.03-3.82)<br>0.55 (0.08-3.70)  | <b>0.041</b><br>0.538            | 2.13 (1.18-3.84)<br>1.16 (0.33-4.06)    | <b>0.012</b><br>0.818 |
| Perceived benefit of officially recommended influenza vaccine exceeds its potential harms (Reference: Yes)<br>Neutral<br>No                                                                   | 0.96 (0.50-1.86)<br>2.00 (0.76-5.25)  | 0.906<br>0.159                   |                                       |                       | 2.33 (1.28)<br>7.79 (3.59-16.93)      | <b>0.005</b><br><b>&lt;0.001</b> |                                         |                       |
| Benefit of officially recommended pneumococcal vaccine exceeds its potential harms<br>Reference: Yes<br>Neutral<br>No                                                                         | 1.24 (0.65-2.35)<br>2.84 (1.11-7.28)  | 0.511<br><b>0.030</b>            |                                       |                       |                                       |                                  | 1.34 (0.76-2.37)<br>3.54 (1.52-8.20)    | 0.314<br><b>0.003</b> |
| Regarding vaccinations, patients should be informed by:<br>Other medical specialist<br>Health insurance company<br>Groups of self-help for vaccine-preventable diseases<br>Public authorities |                                       |                                  | 1.43 (0.85-2.40)<br>1.85 (1.02-3.37)  | 0.176<br><b>0.043</b> |                                       |                                  | 0.74 (0.49-1.10)                        | 0.131                 |
| Financial compensation for vaccinating and counseling is sufficient<br>Reference: Yes<br>Neutral<br>No                                                                                        | 0.53 (0.31-0.93)<br>0.69 (0.43-1.13)  | 0.027<br>0.142                   |                                       |                       | 0.49 (0.26-0.93)<br>0.42 (0.24-0.75)  | <b>0.029</b><br><b>0.003</b>     |                                         |                       |
| <b>Practices</b>                                                                                                                                                                              |                                       |                                  |                                       |                       |                                       |                                  |                                         |                       |
| Not counseling routinely at regular intervals                                                                                                                                                 | 2.83 (1.52-5.26)                      | <b>0.001</b>                     | 1.97 (0.87-4.46)                      | 0.106                 | 2.34 (1.08-5.10)                      | <b>0.032</b>                     | 3.14 (1.46-6.74)                        | <b>0.003</b>          |
| Not counseling due to travel plans                                                                                                                                                            | 2.56 (1.34-4.91)                      | <b>0.005</b>                     |                                       |                       |                                       |                                  | 2.39 (1.16-4.91)                        | <b>0.018</b>          |
| Not counseling when indicated by recall-system                                                                                                                                                |                                       |                                  | 0.50 (0.30-0.82)                      | <b>0.007</b>          |                                       |                                  |                                         |                       |
| Not counseling at preventive checkups                                                                                                                                                         | 0.52 (0.25-1.10)                      | 0.087                            |                                       |                       | 0.30 (0.11-0.83)                      | <b>0.021</b>                     | 0.54 (0.25-1.19)                        | 0.126                 |
| Not counseling at first visit of patient                                                                                                                                                      | 0.75 (0.52-1.07)                      | 0.112                            |                                       |                       |                                       |                                  |                                         |                       |
| Not counseling when patient addresses it                                                                                                                                                      |                                       |                                  |                                       |                       |                                       |                                  | 0.41 (0.15-1.12)                        | 0.084                 |
| Source of information regarding vaccines<br>Continuing training<br>Pharmaceutical representative<br>Professional journals<br>Professional association<br>Specialty: No specialization         | 0.75 (0.52-1.07)<br>1.83 (1.24-2.81)  | 0.108<br><b>0.003</b>            | 1.78 (1.04-3.05)<br>1.64 (0.90-2.98)  | <b>0.034</b><br>0.109 | 1.63 (1.0-2.69)<br>1.95 (1.11-3.43)   | 0.055<br><b>0.021</b>            | 2.16 (1.36-3.43)<br>1.58 (0.95-2.63)    | <b>0.001</b><br>0.077 |
|                                                                                                                                                                                               |                                       |                                  | 0.17 (0.02-1.31)                      | 0.088                 |                                       |                                  |                                         |                       |

Statistical significant Odds Ratios (p<0.05) are shown in bold. SD=Sociodemographic and practice-characteristics
